# Supplementary material
Source: MDPI journal article supplement (https://www.mdpi.com/2504-446X/3/1/18)
Supplement: s1 [file s1]

# Supplementary Information

## UAV-Derived Himalayan Topography: Hazard Assessments and Comparison with Global DEM Products

C. Scott Watson<sup>1,\*</sup>, Jeffrey S. Kargel<sup>2</sup>, Babulal Tiruwa<sup>3</sup>

<sup>1</sup> Department of Hydrology & Atmospheric Sciences, University of Arizona, Tucson, AZ 85721, USA

<sup>2</sup> Planetary Science Institute, Tucson, AZ 85719, USA; jkargel@psi.edu

<sup>3</sup> National Trust for Nature Conservation (NTNC), P.O. Box: 3712, Khumaltar, Lalitpur, Nepal;  
babulaltiruwa@gmail.com

\* Correspondence: scott@rockyglaciers.co.uk;

Table S1. Coregistration of open-access and the UAV DEMs

| Site                                    | DEMs      | Coregistration shift (x, y, z) (m) |
|-----------------------------------------|-----------|------------------------------------|
| Tal village                             | AW3D30 to | -2, -1, -6                         |
|                                         | UAV       |                                    |
| Pisang landslides                       | UAV to    | -29, -27, -142                     |
|                                         | HMA*      |                                    |
|                                         | GDEM2 to  | 22, 20, 10                         |
|                                         | HMA       |                                    |
|                                         | AW3D30 to | 16, -8, 2                          |
|                                         | HMA       |                                    |
| SRTM to                                 | 5, -10, 1 |                                    |
| HMA                                     |           |                                    |
| *Iterative closest point coregistration |           |                                    |

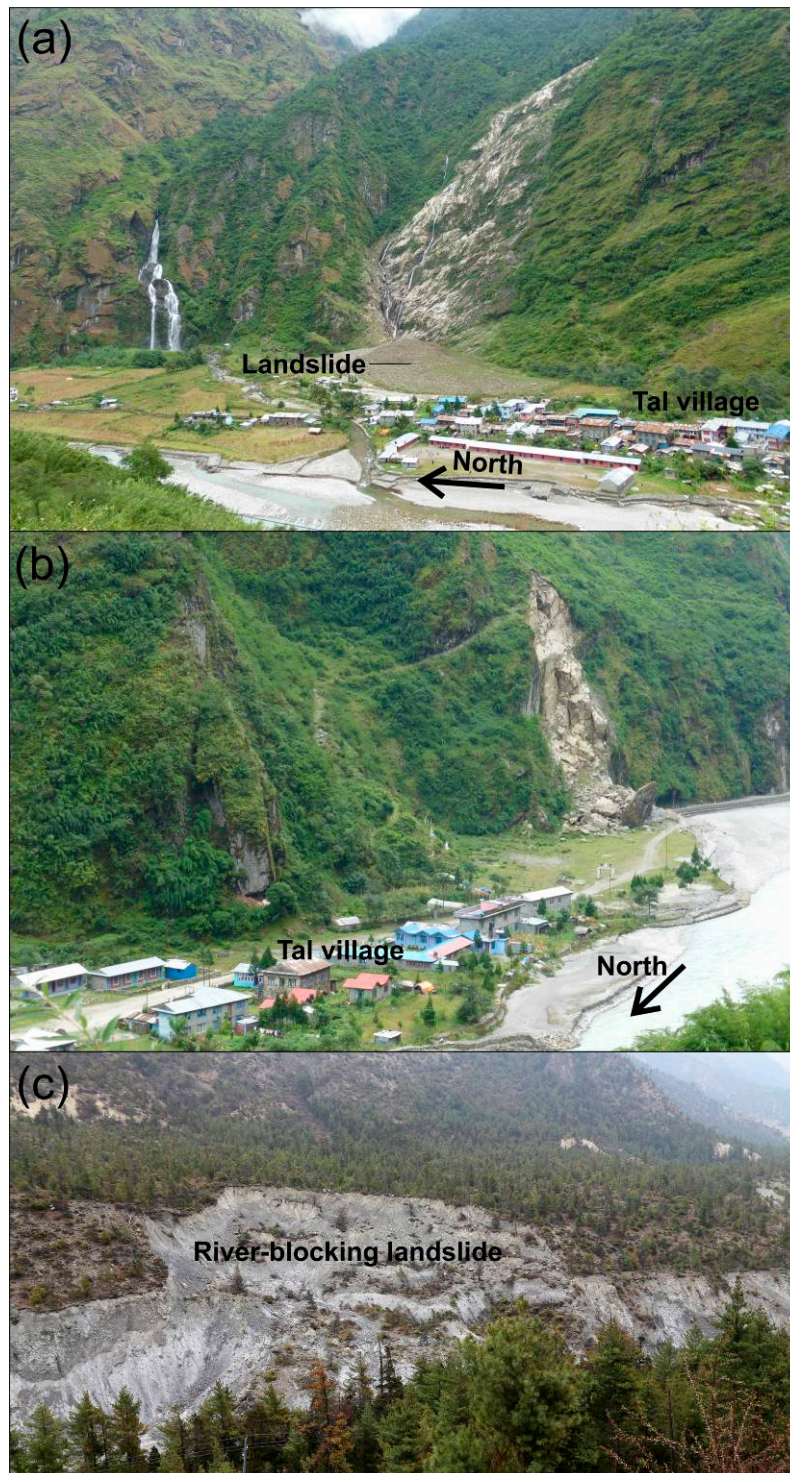

Figure S1. (a–b) Photographs of landslides and rockfall adjacent to Tal village. Photographs taken in October 2013 by Jeffrey Kargel. (c) Photograph of the river-blocking landslide on the Marsyangdi River. Photograph taken in April 2018 by Jeffrey Kargel.
